# Supplementary material
Source: HighWire-hosted journal article supplement (https://injuryprevention.bmj.com/content/26/3/215)
Supplement: inline-supplementary-material-1 [file inline-supplementary-material-1.pdf]

| <b>Subdomain</b><br>[population of interest] | <b>Pass Criteria</b>                                                                                       | <b>Statistics about Hazards</b>                                                                                                                                                                                                                                                                                                                                                                                      | <b>Housing inspection recommendation</b>                                                                                                                    | <b>Cost</b>                                                                           |                                       |
|----------------------------------------------|------------------------------------------------------------------------------------------------------------|----------------------------------------------------------------------------------------------------------------------------------------------------------------------------------------------------------------------------------------------------------------------------------------------------------------------------------------------------------------------------------------------------------------------|-------------------------------------------------------------------------------------------------------------------------------------------------------------|---------------------------------------------------------------------------------------|---------------------------------------|
|                                              |                                                                                                            |                                                                                                                                                                                                                                                                                                                                                                                                                      |                                                                                                                                                             | Product                                                                               | Labor                                 |
| <b>Hot water</b><br>[All]                    | Hot water is 120 degrees Fahrenheit and below.                                                             | <p>According to the U.S. Consumer Product Safety Commission, nearly 3,800 injuries and over 30 deaths occur in the home each year due to hot water burns.<sup>3,4</sup></p> <p>In the United States, the annual cost for scald burn deaths and injuries from all causes among children 14 years and younger is about \$44 million. Children younger than 5 years old contribute to 90% of this cost.<sup>5</sup></p> | <p>Test, adjust, and retest water to ensure water temperature is not above 120 degrees Fahrenheit.</p> <p>Consider installing scald prevention devices.</p> | Thermostatic Mixing Valve (>\$100 per valve) <sup>1</sup>                             | TMV installation (\$150) <sup>2</sup> |
|                                              |                                                                                                            |                                                                                                                                                                                                                                                                                                                                                                                                                      |                                                                                                                                                             | Bathtub thermometer (~\$12) <sup>1</sup><br><br>Candy thermometer (~\$5) <sup>1</sup> |                                       |
| <b>Bathroom Fall Hazards</b><br>[Seniors]    | Having a permanently affixed non-slip treads/ material, non-slip mat, or non-slip decals in the tub/shower | <p>More than 43,000 children younger than 18 years old are treated in an emergency room each year after a bathroom or shower related injury. Slipping and falling caused 81 percent of all injuries.<sup>6</sup></p> <p>For people aged 15 years old or greater, falls are responsible for 81% of all bathroom injuries.<sup>7</sup></p>                                                                             | Install a grab bar and non-slip surface in all tubs/showers.                                                                                                | \$40 <sup>1</sup>                                                                     |                                       |
|                                              | Having a grab bar in the tub/shower                                                                        | The bathroom was found to be the most hazardous room in the home for falls (previously thought to be second behind the kitchen). <sup>8</sup>                                                                                                                                                                                                                                                                        |                                                                                                                                                             |                                                                                       |                                       |

| Subdomain<br>[population of interest] | Pass Criteria                                                                                                    | Statistics about hazards                                                                                                                                                                                                                                                                                                                                     | Housing inspection recommendation                                                                                                                   | Cost                                             |                                                            |
|---------------------------------------|------------------------------------------------------------------------------------------------------------------|--------------------------------------------------------------------------------------------------------------------------------------------------------------------------------------------------------------------------------------------------------------------------------------------------------------------------------------------------------------|-----------------------------------------------------------------------------------------------------------------------------------------------------|--------------------------------------------------|------------------------------------------------------------|
|                                       |                                                                                                                  |                                                                                                                                                                                                                                                                                                                                                              |                                                                                                                                                     | Product                                          | Labor                                                      |
| Fire Escape<br>[All]                  | Having at least two exits in the room                                                                            | 80.7% of all fire deaths, occurred in the home, this is an increase of 6.8% compared to 2015. <sup>9</sup><br><br>There was a civilian fire death every 2 hours and 35 minutes and a civilian fire injury every 35 minutes 54 seconds in 2016. <sup>9</sup>                                                                                                  | Make sure that every room in the home has at least 2 exits.                                                                                         | N/A                                              |                                                            |
| Crowding<br>[All]                     | No furniture in the room or placement/ amount of items allows for freedom of movement                            | In 2016, there were an estimated 352,000 reported home structure fires and 2,735 associated civilian deaths, and 14,650 civilian injuries in the United States. <sup>9</sup><br><br>Fire and burn injuries cost about \$7.5 billion each year. <sup>10</sup>                                                                                                 | Adjust furniture placement so that no furniture would restrict one from moving around and entering/ exiting the room.                               | N/A                                              |                                                            |
|                                       | Furniture and other items in the living room are arranged in such a way that you can easily enter/ exit the room |                                                                                                                                                                                                                                                                                                                                                              |                                                                                                                                                     |                                                  |                                                            |
| Electrical Safety Concerns<br>[All]   | Power strip has a UL or FM label                                                                                 | Between 2010 and 2014, U.S. municipal fire departments responded to an average of 45,210 home structure fires involving electrical failure or malfunction. These fires caused annual averages of 420 civilian deaths, 1,370 civilian injuries, and \$1.4 billion in direct property damage. <sup>11</sup>                                                    | Make sure that all electrical outlets and power strips are not presenting any fire hazards, are not overloaded, and have a proper switch and label. | \$10-25/strip<br><br>\$15-25/outlet <sup>2</sup> | \$10-25/strip<br><br>\$50-75/outlet (or more) <sup>2</sup> |
|                                       | Power strip has a toggle/ switch, breaker or fuse                                                                |                                                                                                                                                                                                                                                                                                                                                              |                                                                                                                                                     |                                                  |                                                            |
|                                       | Electrical outlets are not overloaded                                                                            | Roughly half (57%) of home electrical failure fires from 2010-2014 involved electrical distribution or lighting equipment. Of 31,960 non-confined home structure fires involving electrical distribution or lighting equipment, there were 400 civilian deaths, 1,180 civilian injuries, and \$1.2 billion in direct property damage per year. <sup>11</sup> |                                                                                                                                                     |                                                  |                                                            |
|                                       | No electrical or extension cords are a fire hazard                                                               |                                                                                                                                                                                                                                                                                                                                                              |                                                                                                                                                     |                                                  |                                                            |

| Subdomain<br>[population of interest]       | Pass Criteria                                                                                                                | Statistics about hazards                                                                                                                                                                                                                                                           | Housing inspection recommendation                                                                                                                      | Cost                                                                                           |                                    |
|---------------------------------------------|------------------------------------------------------------------------------------------------------------------------------|------------------------------------------------------------------------------------------------------------------------------------------------------------------------------------------------------------------------------------------------------------------------------------|--------------------------------------------------------------------------------------------------------------------------------------------------------|------------------------------------------------------------------------------------------------|------------------------------------|
|                                             |                                                                                                                              |                                                                                                                                                                                                                                                                                    |                                                                                                                                                        | Product                                                                                        | Labor                              |
| <b>Electrical Tripping Hazards</b><br>[All] | No electrical or extension cords are a tripping hazard                                                                       | An estimated 3,300 residential fires originate from extension cords each year, killing and injuring over 300 people. <sup>12</sup><br><br>More than half of the injuries from tripping over extension cords involved fractures, lacerations, contusions, or sprains. <sup>13</sup> | Reposition/ rerun electrical cords so they are no longer a tripping hazard.                                                                            | \$20-60/ <sup>2</sup>                                                                          | \$40-75/ <sup>2</sup>              |
| <b>Protruding Nails</b><br>[All]            | No protruding nails/screws in the walls and floors that could cause someone to cut themselves                                | A query of 2008 NEISS data for children under 18 indicated that there were 31,243 annual injuries associated with protruding nails. <sup>14</sup>                                                                                                                                  | Remove and replace (or hammer in) all protruding nails.                                                                                                | \$0-15/ area <sup>2</sup>                                                                      | \$20-100/ area <sup>2</sup>        |
| <b>Tipping Hazards</b><br>[Children]        | No entertainment center 4 feet above the ground is present in the room or if present in this room, it is secured to the wall | An average of 30,700 “falling furniture” injuries are reported annually, 52% involved children. <sup>15</sup><br><br>Each day, more than 40 children younger than 18 years old visit the emergency department for injuries from furniture tip-overs. <sup>15</sup>                 | Move entertainment centers, bookcases, and TVs to places where they are less than 4 feet above the ground.<br><br>Secure stove to the wall or cabinet. | Furniture Wall Straps- 2 pack (\$10.00) <sup>1</sup><br><br>Too variable to price <sup>2</sup> | Too variable to price <sup>2</sup> |
|                                             | No bookcases are present in the room or if present in this room, it is secured to the wall                                   |                                                                                                                                                                                                                                                                                    |                                                                                                                                                        |                                                                                                |                                    |
|                                             | No flat screen TVs are present in the room or if present in this room, it is secured to the wall                             |                                                                                                                                                                                                                                                                                    |                                                                                                                                                        |                                                                                                |                                    |
|                                             | No traditional TVs are present in the room or if present in this room, it is secured to the wall                             |                                                                                                                                                                                                                                                                                    |                                                                                                                                                        |                                                                                                |                                    |
|                                             | Stove must be secured to wall or cabinet/counter                                                                             |                                                                                                                                                                                                                                                                                    |                                                                                                                                                        |                                                                                                |                                    |

| Subdomain<br>[population of interest] | Pass Criteria                                                                                 | Statistics about hazards                                                                                                                                                                                                                                                                                                                                                                                                                                                                                          | Housing inspection recommendation                                                             | Cost                                              |                      |
|---------------------------------------|-----------------------------------------------------------------------------------------------|-------------------------------------------------------------------------------------------------------------------------------------------------------------------------------------------------------------------------------------------------------------------------------------------------------------------------------------------------------------------------------------------------------------------------------------------------------------------------------------------------------------------|-----------------------------------------------------------------------------------------------|---------------------------------------------------|----------------------|
|                                       |                                                                                               |                                                                                                                                                                                                                                                                                                                                                                                                                                                                                                                   |                                                                                               | Product                                           | Labor                |
| <b>Carbon Monoxide Alarm</b><br>[All] | Having at least one working CO alarm in the home                                              | <p>An average of 439 people died annually during 1999-2004 from unintentional, non-fire related CO poisoning.<sup>16</sup></p> <p>The CDC estimated an average of 20,636 nonfatal, unintentional, and non-fire related CO exposures were seen in the ER each year from 2004-2006.<sup>17</sup></p> <p>CO alarms are one of the most important protective devices for preventing CO exposure and poisoning in the homes.<sup>18</sup></p>                                                                          | Check/install carbon monoxide alarms in the home.                                             | CO alarm (battery operated) (\$15) <sup>1</sup>   | \$25-40 <sup>2</sup> |
| <b>Poison Storage</b><br>[Children]   | All prescription medicines, over-the-counter medicines and household products are locked away | <p>In 2008, over 41,000 people died as a result of poisoning.<sup>19</sup></p> <p>It was noted that in 2008, the number of poisoning deaths exceeded the number of motor vehicle traffic deaths for the first time since at least 1980. Poisoning is now the leading cause of death from injuries in the US, increasing from 3.0 per 100,000 in 1979 to 13.1 per 100,000 in 2012.<sup>20</sup></p> <p>91% of unintentional poisoning deaths are caused by drugs, mainly opioid pain medications.<sup>20</sup></p> | Check medicine cabinet to make sure all medicines are locked and closed with childproof caps. | Cabinet slide lock (\$2.00 per lock) <sup>1</sup> |                      |
|                                       | All prescription and over-the-counter medicines have childproof caps                          | <p>46.4% of the 2.159 million calls to Poison Help Number in 2016 involved children ages 5 and younger. 85.1% of poisonings occur at home without a visit to the ER or physician.<sup>20</sup></p>                                                                                                                                                                                                                                                                                                                |                                                                                               |                                                   |                      |

| Subdomain<br>[population of interest] | Pass Criteria                                                                                                                                                                                                                                                                                                                                                           | Statistics about hazards                                                                                                                                                                                                    | Housing inspection recommendation                                                                         | Cost                                                                             |                                         |
|---------------------------------------|-------------------------------------------------------------------------------------------------------------------------------------------------------------------------------------------------------------------------------------------------------------------------------------------------------------------------------------------------------------------------|-----------------------------------------------------------------------------------------------------------------------------------------------------------------------------------------------------------------------------|-----------------------------------------------------------------------------------------------------------|----------------------------------------------------------------------------------|-----------------------------------------|
|                                       |                                                                                                                                                                                                                                                                                                                                                                         |                                                                                                                                                                                                                             |                                                                                                           | Product                                                                          | Labor                                   |
| Interior Stairs Safety<br>[All]       | Stairs are perfect and safe. There are no loose or broken steps, damages or uneven surfaces, disrepair or other safety threats?. The risers are not greater than 7.75" in height and are consistent. The treads are not less than 10" in depth & are consistent. Both risers & treads are free from defect. If a runner or carpet covers stairs, it's free from defect. | An estimated 931,886 children aged less than 5 years old were treated for stair-related injuries from 1999 through 2008, averaging 93,189 injuries per year and 46.5 injuries per 10,000 population annually. <sup>21</sup> | Repair any loose, damaged, or uneven steps.                                                               | Stairs are almost never even. Repair defects- \$50-150.                          | \$65-300.                               |
|                                       | At the bottom of the staircase, the right or the left side has an open handrail only or an open with handrail and baluster (guardrails, spindles). The openings of the guardrail are not greater than 4". The Baluster and spindles is secure. The handrail is secure.                                                                                                  | About a third of seniors 65 and older fall annually. <sup>22</sup>                                                                                                                                                          | Install handrails/guardrails for the staircase.<br><br>Consider stair gates in homes with young children. | Wall rails \$85-175/<br><br>Open rails \$150-250/<br>All unfinished <sup>2</sup> | \$90-175.<br><br>\$125-200 <sup>2</sup> |

| <b>Subdomain</b><br>[population of interest] | <b>Pass Criteria</b>                                                                              | <b>Statistics about hazards</b>                                                                                                                                                                                                                       | <b>Housing inspection recommendation</b>                         | <b>Cost</b>                                                                                                    |       |
|----------------------------------------------|---------------------------------------------------------------------------------------------------|-------------------------------------------------------------------------------------------------------------------------------------------------------------------------------------------------------------------------------------------------------|------------------------------------------------------------------|----------------------------------------------------------------------------------------------------------------|-------|
|                                              |                                                                                                   |                                                                                                                                                                                                                                                       |                                                                  | Product                                                                                                        | Labor |
| <b>Window Safety</b><br>[Children]           | A window stop or guard was present                                                                | Every year since 1983, an average of 12 children have been killed by window blind cords. There has not been a significant decrease in deaths since. Many more have suffered permanent brain damage. <sup>24</sup>                                     | Remove any curtains with cords, and install a window stop/guard. | Window Lock (\$1.25 per lock) <sup>1</sup>                                                                     |       |
|                                              | The blind/curtain was cordless, cord protected, or cord unprotected but inaccessible to the child | From 1990-2015, there were about 16,827 window blind related injuries, about 647 per year. <sup>25</sup><br><br>In 2009, the CPSC recalled over 5 million Roman shades and blinds, it was largest product recall in the CPSC's history. <sup>26</sup> |                                                                  | Window blind cord wind-ups 2 pack (\$2.50) <sup>1</sup><br><br>Cordless window shade (\$30-\$100) <sup>1</sup> |       |

|                             |                                                                                                                                                          |                                                                                                                                                                                                                                                                                                                                              |                                                                 |                                                                                                       |                                 |
|-----------------------------|----------------------------------------------------------------------------------------------------------------------------------------------------------|----------------------------------------------------------------------------------------------------------------------------------------------------------------------------------------------------------------------------------------------------------------------------------------------------------------------------------------------|-----------------------------------------------------------------|-------------------------------------------------------------------------------------------------------|---------------------------------|
| <b>Smoke Alarm</b><br>[All] | At least one smoke detector must be present and working on each level of the unit. Including the basement, but not the crawl spaces and unfinished attic | In 2016, 81% of all U.S. civilian fire deaths occurred in the home. <sup>9</sup><br><br>In 2016, there were roughly 352,000 reported home structure fires in the US and 2,735 associated civilian death. <sup>9</sup>                                                                                                                        |                                                                 | Smoke alarms \$8-\$25 <sup>1</sup>                                                                    | \$30-\$50 per home <sup>2</sup> |
| <b>Sprinkler</b>            | Working Sprinkler system                                                                                                                                 | In 2016, 10.6 billion in property damage was caused by structure fires. <sup>9</sup><br><br>Based on 2016 US data, there is about one structure fire reported every 66 seconds. The same data shows that a civilian fire injury happens roughly every 36 minutes and a civilian fire death occurs every 2 hours and 35 minutes. <sup>9</sup> | Inspect sprinkler systems in home with existing systems.        | The cost of installing home fire sprinklers is about \$1.35 per sprinklered square foot <sup>27</sup> |                                 |
|                             |                                                                                                                                                          |                                                                                                                                                                                                                                                                                                                                              | Consider retrofitting homes without existing sprinkler systems. |                                                                                                       |                                 |

## Reference List

1. Estimate from amazon.com prices.
2. Estimate from professional.
3. Underlying Cause of Death 1999-2016 on CDC WONDER Online Database. Centers for Disease Control and Prevention, National Center for Health Statistics Web site. <http://wonder.cdc.gov/ucd-icd10.html>. Published December 2017. Accessed January 5, 2018.
4. Shields W, Omaki E, Frattaroli S, Shields M, Hien. Still too many scald injuries: An analysis of tap water scalds from the NEISS data set 30 years after the adoption of a voluntary water heater standard. Paper presented at: American Public Health Association; October 2016; Denver, CO.
5. Shields WC, McDonald EM, Pfisterer K, Gielen AC. Scald burns in children under 3 years: An analysis of NEISS narratives to inform a scald burn prevention program. *Injury prevention*. 2015;041559.
6. Mao SJ, McKenzie LB, Xiang H, Smith GA. Injuries associated with bathtubs and showers among children in the united states. *Pediatrics*. 2009;124(2):541-547.
7. Stevens JA, Haas EN, Haileyesus T. Nonfatal bathroom injuries among persons aged  $\geq 15$  years—United states, 2008. *J Saf Res*. 2011;42(4):311-315.
8. Feldman F, Chaudhury H. Falls and the physical environment: A review and a new multifactorial falls-risk conceptual framework. *Canadian Journal of Occupational Therapy*. 2008;75(2):82-95.
9. Haynes J.G. H. Fire loss in the United States during 2016. *NFPA Journal*. 2017.
10. Finkelstein EA, Corso PS, Miller TR. Incidence and economic burden of injuries in the United States. *American Journal of Preventive Medicine*. 2007;32(3):256. doi: 10.1016/j.amepre.2006.11.010.

11. Campbell R. *Electrical fires*. Quincy, MA: National Fire Protection Association; 2017. [http://gateway.proquest.com/openurl?url\\_ver=Z39.88-2004&res\\_dat=xri:c19index-us&rft\\_dat=xri:c19index:NSTC:st12\\_009698](http://gateway.proquest.com/openurl?url_ver=Z39.88-2004&res_dat=xri:c19index-us&rft_dat=xri:c19index:NSTC:st12_009698).
12. Electrical Safety Foundation International. Extension cord safety virtual demonstration. <https://www.esfi.org/resource/extension-cord-safety-virtual-demonstration-214>. Updated 2015. Accessed October 26,2018
13. US Consumer Product Safety Commission. Extension cords fact sheet <http://www.dataspan.com/uploads/pdf/us-consumer-protection-extension-cord-safety-fact-sheet.pdf>. Updated 2010. Accessed October 26,2018
14. Shields W, McDonald E, Frattaroli S, Bishai D, Ma X, Gielen A. Structural housing elements associated with home injuries in children. *Injury prevention: Journal of the International Society for Child and Adolescent Injury Prevention*. 2016;22(2):105-109. 10.1136/injuryprev-2015-041621.
15. Suchy A. Product instability or tip-over injuries and fatalities associated with televisions, furniture, and appliances: 2016 report: Consumer product safety commission injury and death reports;2017 ASI 9166-7.167. *US Consumer Product Safety Commission*. 2016.
16. M King, C Bailey. Carbon monoxide-related deaths — United States, 1999–2004. *Morbidity and Mortality Weekly Report*. 2007;56(50):1309-1312.
17. J Clower, F Yip, J Annest, et al. Nonfatal, unintentional, Non–Fire-related carbon monoxide exposures — United States, 2004–2006. *Morbidity and Mortality Weekly Report*. 2008;57(33):896-899.
18. Krenzelok EP, Roth R, Full R. Carbon monoxide... the silent killer with an audible solution. *American Journal of Emergency Medicine*. 1996;14(5):484-486.
19. Warner M, Chen LH, Makuc DM, Anderson RN, Miniño AM. Drug poisoning deaths in the United States, 1980–2008. *NCHS data brief*. 2011(81):1-8.
20. American Association of Poison Control Centers. Reports to U.S. poison control centers. Poison Statistics National Data 2016 Web site. <https://www.poison.org/poison-statistics-national>. Accessed October 26,2018



21. Ashley E Zielinski, Lynne M Rochette, Gary A Smith. Stair-related injuries to young children treated in US emergency departments, 1999-2008. *Pediatrics*. 2012;129(4):721-727.
22. Stevens JA, Ballesteros MF, Mack KA, Rudd RA, DeCaro E, Adler G. Gender differences in seeking care for falls in the aged Medicare population. *American journal of preventive medicine*. 2012;43(1):59.
24. Parents for Window Blind Safety. Window coverings standard press release. <https://consumerfed.org/pdfs/WindowCoveringsStandardPressRelease.pdf>. Updated 2011. Accessed October 26,2018
25. Onders B, Kim EH, Chounthirath T, Hodges N, Smith G. Pediatric injuries related to window blinds, shades, and cords. *Pediatrics*. 2018;141.
26. CPSC announces voluntary recalls to repair millions of roman shades and roll up blinds by multiple firms. US Consumer Product Safety Commission Web site. <https://www.cpsc.gov/th/node/19955>. Published January 2010. Accessed October 26,2018
27. Newport Partners LLC. *Home fire sprinkler cost assessment*. 1st ed. New York, NY. Springer-Verlag New York. 2014.
